# Supplementary material for: RNA-sequencing analysis of Trichophyton rubrum transcriptome in response to sublethal doses of acriflavine
Source: PubMed Central journal article supplement (PMC4243288; doi:10.1186/1471-2164-15-s7-s1), 2014-10-27
Supplement: 1471-2164-15-S7-S1-S1.pdf [file 1471-2164-15-S7-S1-S1.pdf]

**Table S1**

**General features of the RNA-sequence mapped reads to the *T. rubrum* reference genome.**

| <b>Features</b>               | <b>0 hour</b> | <b>3 hours</b> | <b>12 hours</b> | <b>24 hours</b> |
|-------------------------------|---------------|----------------|-----------------|-----------------|
| Raw reads                     | 50.901.088    | 67.868.533     | 43.067.783      | 40.179.474      |
| High-quality reads            | 48.023.103    | 63.990.375     | 40.470.614      | 37.828.392      |
| Mapped reads Bowtie           | 18.655.974    | 15.858.490     | 9.885.630       | 6.919.535       |
| Mapped reads Tophat           | 15.428.064    | 12.899.690     | 7.669.542       | 5.647.140       |
| Mapped reads 45pb             | 350.436       | 490.333        | 376.286         | 213.899         |
| Mapped reads 40pb             | 239.726       | 476.602        | 339.681         | 230.067         |
| Mapped reads 35pb             | 147.459       | 325.335        | 235.709         | 154.682         |
| Mapped reads mitoDNA          | 1.095.756     | 2.571.798      | 1.728.431       | 989.246         |
| Mapped reads repDNA*          | 9.237.127     | 20.247.164     | 11.585.272      | 13.816.158      |
| <b>Total mapped reads (%)</b> | <b>61,90</b>  | <b>62,43</b>   | <b>59,68</b>    | <b>59,01</b>    |

\*repDNA – repeated DNA.
