# Supplementary material for: RNA-sequencing analysis of Trichophyton rubrum transcriptome in response to sublethal doses of acriflavine
Source: PubMed Central journal article supplement (PMC4243288; doi:10.1186/1471-2164-15-s7-s1), 2014-10-27
Supplement: 1471-2164-15-S7-S1-S4.pdf [file 1471-2164-15-S7-S1-S4.pdf]

**Table S2****Genes modulated in response to acriflavine exposure.****3 hours**

| <b>ID</b>  | <b>3 hours</b> | <b>12 hours</b> | <b>24 hours</b> | <b>Gene Product Name</b>                        |
|------------|----------------|-----------------|-----------------|-------------------------------------------------|
| TERG_04160 | 9.51           |                 |                 | hypothetical protein                            |
| TERG_03272 | 9.40           |                 |                 | pre-mRNA branch site protein p14                |
| TERG_07875 | 9.21           |                 |                 | integral membrane protein                       |
| TERG_03023 | 9.15           |                 |                 | hypothetical protein                            |
| TERG_02897 | 9.08           |                 |                 | methylene-fatty-acyl-phospholipid synthase      |
| TERG_01501 | 8.68           |                 |                 | hypothetical protein                            |
| TERG_00732 | 8.59           |                 |                 | hypothetical protein                            |
| TERG_03159 | 8.56           |                 |                 | hypothetical protein                            |
| TERG_07957 | 8.45           |                 |                 | hypothetical protein                            |
| TERG_03274 | 8.44           |                 |                 | ammonium transporter MeaA                       |
| TERG_05514 | 8.25           |                 |                 | oligosaccharyltransferase subunit ribophorin II |
| TERG_00854 | 8.22           |                 |                 | hypothetical protein                            |
| TERG_00344 | 8.21           |                 |                 | hypothetical protein                            |
| TERG_01219 | 8.15           |                 |                 | malate/L-lactate dehydrogenase                  |
| TERG_08170 | 8.14           |                 |                 | hypothetical protein                            |
| TERG_05137 | 8.11           |                 |                 | microsomal dipeptidase                          |
| TERG_06006 | 7.87           |                 |                 | hypothetical protein                            |
| TERG_08522 | 7.86           |                 |                 | pyruvate dehydrogenase E1 B-subunit             |
| TERG_08993 | 7.70           |                 |                 | hypothetical protein                            |
| TERG_04487 | 7.69           |                 |                 | hypothetical protein                            |
| TERG_06506 | 7.69           |                 |                 | hypothetical protein                            |
| TERG_07879 | 7.64           |                 |                 | hypothetical protein                            |
| TERG_00575 | 7.62           |                 |                 | hypothetical protein                            |
| TERG_04531 | 7.53           |                 |                 | hypothetical protein                            |
| TERG_02819 | 7.52           |                 |                 | hypothetical protein                            |
| TERG_02385 | 7.51           |                 |                 | hypothetical protein                            |
| TERG_02734 | 7.11           |                 |                 | hypothetical protein                            |
| TERG_05478 | 6.96           |                 |                 | chromatin remodeling complex subunit Arp5       |
| TERG_07970 | 6.94           |                 |                 | hypothetical protein                            |
| TERG_01291 | 6.62           |                 |                 | hypothetical protein                            |
| TERG_00731 | 6.53           |                 |                 | hypothetical protein                            |
| TERG_04504 | 2.44           |                 |                 | hypothetical protein                            |
| TERG_07491 | 2.33           |                 |                 | hypothetical protein                            |
| TERG_03388 | 2.18           |                 |                 | hypothetical protein                            |
| TERG_00616 | 2.15           |                 |                 | sodium transport ATPase                         |
| TERG_05363 | 2.14           |                 |                 | hypothetical protein                            |
| TERG_04952 | 2.14           |                 |                 | ABC transporter                                 |
| TERG_04899 | 2.13           |                 |                 | ubiquitin fusion protein                        |
| TERG_03037 | 2.03           |                 |                 | dnaK-type molecular chaperone                   |
| TERG_01242 | 1.94           |                 |                 | short chain dehydrogenase/reductase             |

---

|            |      |                                                                      |
|------------|------|----------------------------------------------------------------------|
| TERG_06367 | 1.92 | hypothetical protein                                                 |
| TERG_01659 | 1.92 | hypothetical protein                                                 |
| TERG_07260 | 1.90 | hypothetical protein                                                 |
| TERG_00807 | 1.88 | hypothetical protein                                                 |
| TERG_08104 | 1.88 | sodium transport ATPase                                              |
| TERG_07921 | 1.86 | adenosine 5'-phosphosulfate kinase                                   |
| TERG_01973 | 1.86 | mRNA cleavage and polyadenylation specificity factor complex subunit |
| TERG_08609 | 1.83 | UV excision repair protein Rad2                                      |
| TERG_06315 | 1.81 | hypothetical protein                                                 |
| TERG_03283 | 1.80 | hypothetical protein                                                 |
| TERG_03414 | 1.80 | acetyl-CoA carboxylase                                               |
| TERG_04521 | 1.77 | hypothetical protein                                                 |
| TERG_04776 | 1.76 | SH3 domain-containing protein                                        |
| TERG_04662 | 1.75 | protein disulfide isomerase                                          |
| TERG_02028 | 1.75 | FAS1 domain-containing protein                                       |
| TERG_02891 | 1.72 | hypothetical protein                                                 |
| TERG_00109 | 1.71 | hypothetical protein                                                 |
| TERG_01871 | 1.71 | acetyl-CoA acetyltransferase                                         |
| TERG_03464 | 1.69 | stress protein DDR48                                                 |
| TERG_08527 | 1.69 | fatty acid synthase alpha subunit                                    |
| TERG_00240 | 1.68 | hypothetical protein                                                 |
| TERG_07456 | 1.68 | hypothetical protein                                                 |
| TERG_05484 | 1.68 | acyl-CoA dehydrogenase                                               |
| TERG_07527 | 1.67 | calnexin                                                             |
| TERG_05769 | 1.65 | D-xylose reductase                                                   |
| TERG_01107 | 1.65 | anthranilate synthase component I                                    |
| TERG_08405 | 1.65 | leucine aminopeptidase                                               |
| TERG_01334 | 1.64 | C6 finger domain-containing protein                                  |
| TERG_07041 | 1.63 | hypothetical protein                                                 |
| TERG_07997 | 1.63 | acetamidase                                                          |
| TERG_07587 | 1.62 | hypothetical protein                                                 |
| TERG_03618 | 1.61 | endochitinase                                                        |
| TERG_07713 | 1.61 | homoserine kinase                                                    |
| TERG_03062 | 1.61 | DnaJ domain-containing protein                                       |
| TERG_06505 | 1.61 | hsp70-like protein                                                   |
| TERG_07946 | 1.61 | 3-ketodihydrosphingosine reductase                                   |
| TERG_03158 | 1.60 | hypothetical protein                                                 |
| TERG_03781 | 1.58 | pyruvate dehydrogenase complex                                       |
| TERG_01640 | 1.58 | hypothetical protein                                                 |
| TERG_07764 | 1.58 | protein transporter SEC61 alpha subunit                              |
| TERG_04096 | 1.57 | SUMO activating enzyme                                               |
| TERG_06007 | 1.57 | coatamer subunit alpha                                               |
| TERG_08065 | 1.57 | membrane transporter                                                 |
| TERG_04400 | 1.56 | monosaccharide transporter                                           |
| TERG_05797 | 1.55 | hypothetical protein                                                 |

---

|            |       |                                             |
|------------|-------|---------------------------------------------|
| TERG_02221 | 1.54  | proteasome subunit beta                     |
| TERG_03736 | 1.54  | transcriptional corepressor Cyc8            |
| TERG_07012 | 1.54  | fibrillarlin                                |
| TERG_05737 | 1.53  | hypothetical protein                        |
| TERG_03224 | 1.52  | choline oxidase                             |
| TERG_06511 | 1.52  | mitochondrial escape protein 2              |
| TERG_03487 | 1.51  | translocation protein Sec62                 |
| TERG_02950 | 1.51  | 3',5'-bisphosphate nucleotidase             |
| TERG_00633 | 1.50  | 40S ribosomal protein S9                    |
| TERG_07216 | -1.50 | hypothetical protein                        |
| TERG_02311 | -1.51 | hypothetical protein                        |
| TERG_03629 | -1.51 | hypothetical protein                        |
| TERG_07159 | -1.52 | protein kinase subdomain-containing protein |
| TERG_07987 | -1.53 | hypothetical protein                        |
| TERG_08557 | -1.54 | serine carboxypeptidase                     |
| TERG_02184 | -1.56 | hypothetical protein                        |
| TERG_06993 | -1.58 | hypothetical protein                        |
| TERG_06151 | -1.60 | pyridoxine kinase                           |
| TERG_06707 | -1.62 | arginase                                    |
| TERG_06650 | -1.65 | hypothetical protein                        |
| TERG_08422 | -1.71 | hypothetical protein                        |
| TERG_02176 | -1.79 | small nuclear ribonucleoprotein LSM2        |
| TERG_06333 | -1.81 | DNA ligase 4                                |
| TERG_08213 | -1.86 | hypothetical protein                        |
| TERG_01330 | -1.90 | hypothetical protein                        |
| TERG_08046 | -2.01 | hypothetical protein                        |
| TERG_05617 | -2.04 | hypothetical protein                        |
| TERG_06883 | -2.22 | hypothetical protein                        |

Gene expression values are expressed in  $\log_2$  fold change between each time point and the control (0 hour).

### 12 hours

| ID         | 3 hours | 12 hours | 24 hours | Gene Product Name             |
|------------|---------|----------|----------|-------------------------------|
| TERG_01685 |         | 9.98     |          | glutathione transferase       |
| TERG_05361 |         | 9.03     |          | cript family protein          |
| TERG_06053 |         | 8.37     |          | catalase                      |
| TERG_08680 |         | 2.20     |          | hypothetical protein          |
| TERG_05284 |         | 2.18     |          | hypothetical protein          |
| TERG_06647 |         | 1.92     |          | hypothetical protein          |
| TERG_08979 |         | 1.91     |          | CMGC/SRPK protein kinase      |
| TERG_02369 |         | 1.81     |          | MFS transporter               |
| TERG_03896 |         | 1.78     |          | mannose-6-phosphate isomerase |
| TERG_00020 |         | 1.72     |          | SH3 domain-containing protein |
| TERG_08059 |         | 1.70     |          | membrane transporter          |

|            |       |                                                  |
|------------|-------|--------------------------------------------------|
| TERG_04518 | 1.70  | chromatin assembly factor 1 subunit C            |
| TERG_01062 | 1.68  | hypothetical protein                             |
| TERG_06500 | 1.62  | mitochondrial carrier protein                    |
| TERG_08431 | 1.61  | hypothetical protein                             |
| TERG_00614 | 1.61  | dihydrodipicolinate synthetase                   |
| TERG_05175 | 1.60  | hypothetical protein                             |
| TERG_07323 | 1.58  | hypothetical protein                             |
| TERG_07672 | 1.56  | GABA permease                                    |
| TERG_01738 | 1.55  | hypothetical protein                             |
| TERG_07876 | 1.55  | hypothetical protein                             |
| TERG_08054 | 1.53  | homoserine acetyltransferase                     |
| TERG_06504 | 1.53  | hypothetical protein                             |
| TERG_07802 | 1.50  | aerobactin siderophore biosynthesis protein iucB |
| TERG_08825 | -1.61 | hypothetical protein                             |
| TERG_02303 | -1.62 | ankyrin repeat protein                           |
| TERG_05558 | -1.68 | ornithine decarboxylase                          |
| TERG_07518 | -1.72 | histidyl-tRNA synthetase                         |
| TERG_08961 | -1.81 | hypothetical protein                             |
| TERG_05828 | -1.83 | DNA excision repair protein                      |
| TERG_06116 | -1.84 | indoleamine 2,3-dioxygenase                      |
| TERG_01550 | -2.23 | 60S ribosomal protein L38                        |
| TERG_01496 | -2.24 | hypothetical protein                             |
| TERG_00298 | -5.85 | hypothetical protein                             |

### 24 hours

| ID         | 3 hours | 12 hours | 24 hours | Gene Product Name                         |
|------------|---------|----------|----------|-------------------------------------------|
| TERG_00209 |         |          | 11.66    | hypothetical protein                      |
| TERG_05855 |         |          | 9.73     | ZIP zinc transporter                      |
| TERG_06788 |         |          | 9.66     | zinc/iron transporter                     |
| TERG_02583 |         |          | 9.58     | phosphate permease                        |
| TERG_05445 |         |          | 4.15     | hypothetical protein                      |
| TERG_00911 |         |          | 3.46     | hypothetical protein                      |
| TERG_00967 |         |          | 3.24     | hypothetical protein                      |
| TERG_08353 |         |          | 2.97     | cytochrome P450                           |
| TERG_01956 |         |          | 2.91     | hypothetical protein                      |
| TERG_05270 |         |          | 2.85     | C2H2 finger domain-containing protein     |
| TERG_03172 |         |          | 2.79     | sodium/phosphate symporter                |
| TERG_07469 |         |          | 2.64     | hypothetical protein                      |
| TERG_04107 |         |          | 2.58     | hypothetical protein                      |
| TERG_02278 |         |          | 2.49     | hypothetical protein                      |
| TERG_05615 |         |          | 2.43     | hypothetical protein                      |
| TERG_00714 |         |          | 2.36     | cell pattern formation-associated protein |
| TERG_08228 |         |          | 2.32     | sphinganine hydroxylase                   |
| TERG_03762 |         |          | 2.21     | malate dehydrogenase                      |
| TERG_08503 |         |          | 2.11     | hypothetical protein                      |

---

|            |       |                                                                    |
|------------|-------|--------------------------------------------------------------------|
| TERG_02809 | 1.99  | hypothetical protein                                               |
| TERG_07274 | 1.99  | hypothetical protein                                               |
| TERG_08982 | 1.96  | hypothetical protein                                               |
| TERG_00595 | 1.96  | mitogen-activated protein kinase MAF1                              |
| TERG_07832 | 1.93  | hypothetical protein                                               |
| TERG_04855 | 1.90  | hypothetical protein                                               |
| TERG_01672 | 1.86  | hypothetical protein                                               |
| TERG_06759 | 1.85  | C2H2 transcription factor                                          |
| TERG_08380 | 1.84  | hypothetical protein                                               |
| TERG_01256 | 1.81  | 60S ribosomal protein L14                                          |
| TERG_02818 | 1.77  | hypothetical protein                                               |
| TERG_04382 | 1.75  | c-14 sterol reductase                                              |
| TERG_03923 | 1.73  | hypothetical protein                                               |
| TERG_08090 | 1.73  | plasma membrane iron permease                                      |
| TERG_01623 | 1.72  | MFS transporter                                                    |
| TERG_05178 | 1.69  | nuclear and cytoplasmic polyadenylated<br>RNA-binding protein pub1 |
| TERG_02198 | 1.68  | CAMK protein kinase                                                |
| TERG_07681 | 1.68  | hypothetical protein                                               |
| TERG_08023 | 1.68  | NAD(P) transhydrogenase                                            |
| TERG_01994 | 1.67  | hypothetical protein                                               |
| TERG_07555 | 1.67  | CAMKK protein kinase                                               |
| TERG_04042 | 1.66  | serine/threonine protein kinase                                    |
| TERG_00838 | 1.65  | zinc finger transcription factor pacC                              |
| TERG_07236 | 1.65  | hypothetical protein                                               |
| TERG_05381 | 1.64  | Na(+)/H(+) antiporter                                              |
| TERG_07199 | 1.64  | hypothetical protein                                               |
| TERG_05971 | 1.64  | ribonucleotide reductase small subunit RnrA                        |
| TERG_08141 | 1.63  | hypothetical protein                                               |
| TERG_05524 | 1.61  | phospho-2-dehydro-3-deoxyheptonate<br>aldolase                     |
| TERG_00243 | 1.60  | hypothetical protein                                               |
| TERG_00976 | 1.60  | serine hydroxymethyltransferase                                    |
| TERG_00625 | 1.59  | Glucanosyltransferase                                              |
| TERG_00393 | 1.56  | hypothetical protein                                               |
| TERG_05518 | 1.54  | short chain dehydrogenase                                          |
| TERG_01127 | 1.54  | glucan synthase                                                    |
| TERG_05832 | 1.54  | serine/threonine protein phosphatase                               |
| TERG_01731 | 1.53  | hypothetical protein                                               |
| TERG_00802 | 1.52  | hypothetical protein                                               |
| TERG_07810 | 1.50  | hypothetical protein                                               |
| TERG_02450 | -1.50 | phosphoserine phosphatase                                          |
| TERG_04726 | -1.50 | nuclear transcription factor Y subunit B-7                         |
| TERG_03684 | -1.51 | stress activated MAP kinase interacting protein                    |
| TERG_00174 | -1.51 | anion-transporting ATPase                                          |
| TERG_03307 | -1.52 | hypothetical protein                                               |
| TERG_02063 | -1.52 | hypothetical protein                                               |

---

---

|            |       |                                                          |
|------------|-------|----------------------------------------------------------|
| TERG_00278 | -1.53 | electron transfer flavoprotein-ubiquinone oxidoreductase |
| TERG_03263 | -1.53 | GTPase activating protein Gyp1                           |
| TERG_04363 | -1.53 | cysteine synthase                                        |
| TERG_05265 | -1.53 | DEAD/DEAH box helicase                                   |
| TERG_03221 | -1.53 | C6 transcription factor                                  |
| TERG_01165 | -1.54 | 40S ribosomal protein S10-A                              |
| TERG_03102 | -1.54 | sterol 24-C-methyltransferase                            |
| TERG_02603 | -1.54 | hypothetical protein                                     |
| TERG_02788 | -1.56 | DNA-directed RNA polymerase I                            |
| TERG_06113 | -1.56 | hypothetical protein                                     |
| TERG_02532 | -1.56 | hypothetical protein                                     |
| TERG_01588 | -1.56 | 60S ribosome biogenesis protein Mak1 l                   |
| TERG_02237 | -1.56 | 30S ribosomal protein S28e                               |
| TERG_03804 | -1.58 | dihydroxyacid dehydratase                                |
| TERG_04983 | -1.58 | histone acetyltransferase E                              |
| TERG_08336 | -1.59 | MFS multidrug transporter                                |
| TERG_02886 | -1.59 | hypothetical protein                                     |
| TERG_01163 | -1.59 | hypothetical protein                                     |
| TERG_04512 | -1.60 | transcriptional regulator Cwf13/SkiP                     |
| TERG_07525 | -1.60 | methionine aminopeptidase                                |
| TERG_07058 | -1.61 | hypothetical protein                                     |
| TERG_04852 | -1.61 | U-box domain-containing protein                          |
| TERG_02283 | -1.61 | MFS transporter                                          |
| TERG_02644 | -1.62 | hypothetical protein                                     |
| TERG_02325 | -1.62 | T-complex protein 1                                      |
| TERG_01603 | -1.63 | hypothetical protein                                     |
| TERG_05257 | -1.63 | integral membrane protein                                |
| TERG_03494 | -1.64 | hypothetical protein                                     |
| TERG_03654 | -1.65 | NADH-cytochrome b5 reductase                             |
| TERG_06187 | -1.65 | nucleolar ATPase Kre33                                   |
| TERG_00903 | -1.65 | SNF7 family protein                                      |
| TERG_04139 | -1.65 | hypothetical protein                                     |
| TERG_04692 | -1.66 | replication factor A 1                                   |
| TERG_04951 | -1.66 | hypothetical protein                                     |
| TERG_06398 | -1.66 | Hsp90 co-chaperone Cdc37                                 |
| TERG_06090 | -1.67 | C2H2 transcription factor                                |
| TERG_00008 | -1.68 | MFS phospholipid transporter                             |
| TERG_00075 | -1.70 | hypothetical protein                                     |
| TERG_03516 | -1.73 | mitochondrial dicarboxylate Carrier                      |
| TERG_03933 | -1.73 | ABC metal ion transporter                                |
| TERG_07779 | -1.75 | LCCL domain-containing protein                           |
| TERG_00961 | -1.75 | T-complex protein 1                                      |
| TERG_01310 | -1.75 | nascent polypeptide-associated complex subunit beta      |
| TERG_06103 | -1.76 | uroporphyrinogen decarboxylase                           |
| TERG_06846 | -1.77 | IMP dehydrogenase                                        |

---

---

|            |       |                                                      |
|------------|-------|------------------------------------------------------|
| TERG_05827 | -1.77 | sphingolipid long chain base-responsive protein PIL1 |
| TERG_08367 | -1.79 | aconitate hydratase                                  |
| TERG_07897 | -1.79 | CCAAT-box-binding transcription factor               |
| TERG_06207 | -1.80 | hypothetical protein                                 |
| TERG_02491 | -1.81 | glutaryl-CoA dehydrogenase                           |
| TERG_06177 | -1.81 | peroxisomal carrier protein                          |
| TERG_04807 | -1.81 | Aminotransferase                                     |
| TERG_01281 | -1.83 | malate synthase                                      |
| TERG_01597 | -1.84 | small nucleolar ribonucleoprotein complex subunit    |
| TERG_06451 | -1.84 | nucleolus protein required for cell viability        |
| TERG_02031 | -1.84 | methylenetetrahydrofolate dehydrogenase              |
| TERG_07639 | -1.85 | atypical/ABC1/ABC1-B protein kinase                  |
| TERG_03202 | -1.86 | eukaryotic translation initiation factor 3 subunit C |
| TERG_00217 | -1.88 | Ubiquitin                                            |
| TERG_03935 | -1.89 | hypothetical protein                                 |
| TERG_01002 | -1.90 | chaperone dnaK                                       |
| TERG_02979 | -1.91 | Delta(24(24(1)))-sterol reductase                    |
| TERG_07157 | -1.91 | hypothetical protein                                 |
| TERG_03262 | -1.92 | dimethyladenosine transferase dimethyltransferase    |
| TERG_00069 | -1.93 | Fumarylacetoacetase                                  |
| TERG_02078 | -1.93 | thiamine biosynthesis protein Nmt1                   |
| TERG_02172 | -1.95 | cytochrome P450 monooxygenase                        |
| TERG_00232 | -1.95 | rRNA processing protein Nop9                         |
| TERG_02833 | -1.95 | hypothetical protein                                 |
| TERG_06078 | -1.96 | eukaryotic translation initiation factor 3 subunit   |
| TERG_06147 | -2.02 | rubredoxin-NAD(+) reductase                          |
| TERG_00604 | -2.02 | nucleolar protein 16                                 |
| TERG_06792 | -2.03 | hypothetical protein                                 |
| TERG_04686 | -2.04 | porphobilinogen synthase                             |
| TERG_07027 | -2.08 | MFS drug transporter                                 |
| TERG_03292 | -2.10 | NADH-ubiquinone oxidoreductase 24 kDa subunit        |
| TERG_03360 | -2.10 | prolyl peptidase                                     |
| TERG_00181 | -2.10 | nucleolar protein NOP58                              |
| TERG_06522 | -2.10 | mitochondrial cytochrome b2                          |
| TERG_00281 | -2.16 | AGC/RSK protein kinase                               |
| TERG_07140 | -2.17 | serine/threonine protein kinase                      |
| TERG_07585 | -2.18 | Emp24/gp25L/p24 membrane trafficking protein         |
| TERG_06452 | -2.20 | purine nucleoside phosphorylase                      |
| TERG_06573 | -2.25 | calcineurin regulatory subunit B                     |
| TERG_05058 | -2.26 | thiamine pyrophosphokinase                           |
| TERG_05388 | -2.27 | ribosome biogenesis protein                          |
| TERG_06783 | -2.28 | nucleolar GTP-binding protein                        |
| TERG_00820 | -2.30 | MFS multidrug resistance transporter                 |
| TERG_03780 | -2.53 | hypothetical protein                                 |
| TERG_03455 | -2.70 | isochorismatase family hydrolase                     |
| TERG_00067 | -2.89 | hypothetical protein                                 |

---

|            |       |                            |
|------------|-------|----------------------------|
| TERG_00546 | -3.04 | Glutaredoxin               |
| TERG_04238 | -3.38 | cation-transporting ATPase |
| TERG_03385 | -9.43 | hypothetical protein       |

### 3 and 12 hours

| ID         | 3 hours | 12 hours | 24 hours | Gene Product Name                           |
|------------|---------|----------|----------|---------------------------------------------|
| TERG_00500 | 8.43    | 9.57     |          | hypothetical protein                        |
| TERG_02069 | 8.75    | 9.54     |          | hypothetical protein                        |
| TERG_07426 | 8.55    | 9.25     |          | hypothetical protein                        |
| TERG_05520 | 8.63    | 8.79     |          | hypothetical protein                        |
| TERG_03127 | 7.32    | 8.70     |          | hypothetical protein                        |
| TERG_08976 | 8.46    | 8.43     |          | hypothetical protein                        |
| TERG_03764 | 8.02    | 8.35     |          | hypothetical protein                        |
| TERG_08259 | 7.02    | 8.16     |          | hypothetical protein                        |
| TERG_01658 | 3.18    | 3.16     |          | hypothetical protein                        |
| TERG_00856 | 2.35    | 2.56     |          | hypothetical protein                        |
| TERG_00580 | 3.31    | 2.55     |          | 7-dehydrocholesterol reductase              |
| TERG_02001 | 1.86    | 2.49     |          | oligopeptidase                              |
| TERG_04765 | 2.30    | 2.35     |          | hypothetical protein                        |
| TERG_01507 | 2.37    | 2.29     |          | hypothetical protein                        |
| TERG_08264 | 1.64    | 2.20     |          | mannitol dehydrogenase                      |
| TERG_06757 | 2.89    | 2.18     |          | hypothetical protein                        |
| TERG_07928 | 2.18    | 2.11     |          | hypothetical protein                        |
| TERG_00624 | 2.44    | 2.07     |          | actin polymerization protein Bzz1           |
| TERG_01122 | 1.94    | 1.95     |          | hypothetical protein                        |
| TERG_03597 | 1.78    | 1.93     |          | integral membrane protein                   |
| TERG_07566 | 2.48    | 1.88     |          | hypothetical protein                        |
| TERG_00250 | 1.62    | 1.78     |          | N-acetylglucosamine-phosphate mutase        |
| TERG_04125 | 1.71    | 1.73     |          | citrate synthase                            |
| TERG_02140 | 1.70    | 1.64     |          | bZIP transcription factor                   |
| TERG_08388 | 1.71    | 1.56     |          | hypothetical protein                        |
| TERG_04103 | -1.87   | -1.51    |          | hypothetical protein                        |
| TERG_06250 | -1.81   | -1.54    |          | hypothetical protein                        |
| TERG_03303 | -1.52   | -1.73    |          | extracellular 3-ketosteroid 1-dehydrogenase |
| TERG_02012 | -1.67   | -2.03    |          | hypothetical protein                        |
| TERG_08231 | -2.21   | -2.21    |          | hypothetical protein                        |
| TERG_01981 | -1.78   | -2.24    |          | hypothetical protein                        |

### 3 and 24 hours

| ID | 3 hours | 12 hours | 24 hours | Gene Product Name |
|----|---------|----------|----------|-------------------|
|----|---------|----------|----------|-------------------|



|            |       |       |                                             |
|------------|-------|-------|---------------------------------------------|
| TERG_05040 | 1.74  | 3.01  | hypothetical protein                        |
| TERG_03234 | 1.80  | 2.51  | hypothetical protein                        |
| TERG_02447 | 2.25  | 2.30  | ATP sulphurylase                            |
| TERG_07631 | 1.74  | 2.10  | hypothetical protein                        |
| TERG_02787 | 2.34  | 2.00  | protein kinase subdomain-containing protein |
| TERG_07595 | 1.61  | 1.62  | hypothetical protein                        |
| TERG_08288 | 1.88  | 1.59  | ATP-citrate synthase subunit 1              |
| TERG_00762 | 1.55  | 1.58  | vesicle-fusing ATPase                       |
| TERG_01443 | 1.80  | 1.52  | ABC multidrug transporter                   |
| TERG_00121 | -1.72 | -1.53 | FAD dependent oxidoreductase                |
| TERG_06553 | -1.81 | -1.55 | hypothetical protein                        |
| TERG_06270 | -1.77 | -1.55 | hypothetical protein                        |
| TERG_00865 | 1.78  | -1.63 | hypothetical protein                        |
| TERG_04290 | -1.78 | -1.68 | D-arabinitol dehydrogenase                  |
| TERG_03368 | -1.69 | -1.72 | hypothetical protein                        |
| TERG_08619 | -2.76 | -1.72 | siderophore iron transporter                |
| TERG_03605 | -1.54 | -1.83 | mitochondrial ribosomal protein L16         |
| TERG_03708 | -1.90 | -1.88 | hypothetical protein                        |
| TERG_03364 | -2.00 | -1.99 | hypothetical protein                        |
| TERG_05899 | -1.69 | -2.20 | hypothetical protein                        |
| TERG_03363 | -1.66 | -2.46 | GABA permease                               |
| TERG_08620 | -2.25 | -2.61 | siderophore iron transporter mirB           |
| TERG_07539 | -1.64 | -3.49 | hypothetical protein                        |
| TERG_08906 | -1.62 | -8.74 | hypothetical protein                        |

### 12 and 24 hours

| ID         | 3 hours | 12 hours | 24 hours | Gene Product Name                               |
|------------|---------|----------|----------|-------------------------------------------------|
| TERG_00698 |         | 9.42     | 10.63    | L-ornithine 5-monooxygenase                     |
| TERG_02132 |         | 8.23     | 8.71     | hypothetical protein                            |
| TERG_02242 |         | 2.82     | 5.02     | hypothetical protein                            |
| TERG_03174 |         | 3.69     | 4.97     | siderochrome-iron transporter Sit1              |
| TERG_00511 |         | 2.54     | 3.72     | hypothetical protein                            |
| TERG_00697 |         | 2.79     | 3.51     | non-ribosomal peptide synthetase                |
| TERG_07801 |         | 2.60     | 3.13     | ABC multidrug transporter Mdr4                  |
| TERG_04228 |         | 1.77     | 3.13     | hypothetical protein                            |
| TERG_06267 |         | 1.61     | 3.13     | hypothetical protein                            |
| TERG_03145 |         | 1.61     | 3.03     | hypothetical protein                            |
| TERG_00509 |         | 1.89     | 2.78     | hypothetical protein                            |
| TERG_08201 |         | 1.55     | 2.63     | serine protease                                 |
| TERG_04240 |         | 2.12     | 2.59     | hypothetical protein                            |
| TERG_08102 |         | 1.77     | 2.45     | 3-isopropylmalate dehydrogenase A               |
| TERG_02177 |         | 1.55     | 2.43     | hypothetical protein                            |
| TERG_04862 |         | 2.26     | 2.37     | C6 sexual development transcription factor NosA |
| TERG_02454 |         | 2.02     | 2.30     | deoxyribose-phosphate aldolase                  |
| TERG_02984 |         | 1.83     | 2.28     | cytochrome P450 51                              |

---

|            |       |       |                                               |
|------------|-------|-------|-----------------------------------------------|
| TERG_04234 | 1.79  | 2.24  | hypothetical protein                          |
| TERG_00520 | 2.03  | 2.23  | hypothetical protein                          |
| TERG_01494 | 2.10  | 2.14  | hypothetical protein                          |
| TERG_07241 | 1.75  | 2.06  | saccharopine dehydrogenase                    |
| TERG_08983 | 1.55  | 2.00  | hypothetical protein                          |
| TERG_05651 | 1.79  | 1.95  | hypothetical protein                          |
| TERG_02367 | 1.54  | 1.88  | hypothetical protein                          |
| TERG_00830 | 1.60  | 1.57  | hypothetical protein                          |
| TERG_04105 | 1.91  | 1.57  | cyclin domain-containing protein              |
| TERG_00456 | 1.64  | 1.52  | cysteine dioxygenase                          |
| TERG_04323 | -1.60 | -1.56 | hypothetical protein                          |
| TERG_04194 | -1.61 | -1.72 | acyltransferase                               |
| TERG_02256 | -1.67 | -1.77 | hypothetical protein                          |
| TERG_08130 | -1.70 | -1.77 | ABC transporter                               |
| TERG_07346 | -1.62 | -1.79 | tRNA ligase                                   |
| TERG_01811 | -1.92 | -1.85 | lipase                                        |
| TERG_03625 | -1.62 | -1.94 | hypothetical protein                          |
| TERG_02174 | -2.32 | -1.96 | hypothetical protein                          |
| TERG_08278 | -1.84 | -1.99 | serine/threonine protein kinase               |
| TERG_00959 | -1.94 | -2.04 | hypothetical protein                          |
| TERG_04020 | -2.18 | -2.06 | polymerase                                    |
| TERG_08613 | -1.70 | -2.14 | multidrug resistance protein                  |
| TERG_01644 | -1.70 | -2.15 | SNF2 family helicase/ATPase                   |
| TERG_02942 | -1.78 | -2.22 | hypothetical protein                          |
| TERG_05450 | -2.16 | -2.23 | acetyltransferase                             |
| TERG_07215 | -1.90 | -2.26 | hypothetical protein                          |
| TERG_02029 | -1.63 | -2.31 | hypothetical protein                          |
| TERG_07906 | -1.72 | -2.37 | hypothetical protein                          |
| TERG_05153 | -1.89 | -2.37 | MFS transporter                               |
| TERG_00068 | -2.24 | -2.45 | homogentisate 1,2-dioxygenase                 |
| TERG_03380 | -1.99 | -2.67 | FKBP-type peptidyl-prolyl cis-trans isomerase |
| TERG_00825 | -2.18 | -2.69 | isocitrate lyase                              |
| TERG_04612 | -1.63 | -2.76 | branched-chain-amino-acid aminotransferase    |
| TERG_05668 | -1.69 | -2.80 | hypothetical protein                          |
| TERG_05816 | -3.15 | -2.82 | hypothetical protein                          |
| TERG_06938 | -1.95 | -3.01 | zinc metallopeptidase                         |
| TERG_03529 | -1.78 | -3.11 | hypothetical protein                          |
| TERG_05332 | -1.61 | -3.12 | mitochondrial carrier protein                 |
| TERG_03337 | -2.58 | -3.16 | hypothetical protein                          |
| TERG_07214 | -1.78 | -3.29 | DlpA domain-containing protein                |
| TERG_00066 | -2.58 | -3.32 | 4-hydroxyphenylpyruvate dioxygenase           |
| TERG_01346 | -2.83 | -3.40 | lipase/serine esterase                        |
| TERG_01609 | -2.80 | -3.66 | Na/K ATPase alpha 1 subunit                   |

---

**3, 12 and 24 hours**

| <b>ID</b>  | <b>3 hours</b> | <b>12 hours</b> | <b>24 hours</b> | <b>Gene Product Name</b>                    |
|------------|----------------|-----------------|-----------------|---------------------------------------------|
| TERG_01497 | 5.50           | 5.38            | 6.39            | protein kinase subdomain-containing protein |
| TERG_05744 | 2.26           | 2.76            | 4.29            | GTP-binding protein EsdC                    |
| TERG_07143 | 4.09           | 2.94            | 3.15            | potassium/sodium efflux P-type ATPase       |
| TERG_00710 | 2.22           | 1.71            | 3.03            | hypothetical protein                        |
| TERG_03678 | 1.56           | 1.61            | 2.83            | hypothetical protein                        |
| TERG_01252 | 1.70           | 2.45            | 2.80            | catalase                                    |
| TERG_08286 | 1.90           | 1.96            | 2.60            | hypothetical protein                        |
| TERG_00501 | 1.75           | 2.00            | 2.54            | hypothetical protein                        |
| TERG_06727 | 1.80           | 2.25            | 2.37            | homoserine dehydrogenase                    |
| TERG_08287 | 1.98           | 1.75            | 2.34            | ATP-citrate-lyase                           |
| TERG_01444 | 2.31           | 1.71            | 1.81            | nonribosomal peptide synthase               |
| TERG_02610 | -1.53          | -2.86           | -1.54           | YjgH family protein                         |
| TERG_02199 | -2.36          | -2.62           | -1.70           | glutamate carboxypeptidase                  |
| TERG_02261 | -1.54          | -1.53           | -1.90           | pyruvate formate lyase activating enzyme    |
| TERG_05655 | -1.69          | -1.79           | -1.93           | AN1 zinc finger protein                     |
| TERG_05039 | -1.72          | -2.37           | -1.96           | hypothetical protein                        |
| TERG_06220 | -2.25          | -1.86           | -1.97           | hypothetical protein                        |
| TERG_04458 | -1.62          | -1.95           | -1.99           | inosine triphosphate pyrophosphatase        |
| TERG_04915 | -1.60          | -2.09           | -2.06           | alpha/beta hydrolase                        |
| TERG_07351 | -1.85          | -2.06           | -2.07           | hypothetical protein                        |
| TERG_03166 | -1.67          | -1.68           | -2.14           | hypothetical protein                        |
| TERG_05625 | -2.09          | -1.97           | -2.15           | hypothetical protein                        |
| TERG_06909 | -1.95          | -1.93           | -2.19           | succinate-semialdehyde dehydrogenase        |
| TERG_02196 | -1.72          | -1.75           | -2.25           | l-allo-threonine aldolase                   |
| TERG_00402 | -1.60          | -2.10           | -2.25           | multidrug resistance protein                |
| TERG_00955 | -1.66          | -1.79           | -2.29           | ABC efflux transporter                      |
| TERG_05917 | -1.56          | -1.90           | -2.30           | hypothetical protein                        |
| TERG_07008 | -1.90          | -1.77           | -2.33           | acetylornithine deacetylase                 |
| TERG_06730 | -1.68          | -2.15           | -2.36           | hypothetical protein                        |
| TERG_01893 | -1.92          | -2.36           | -2.39           | hypothetical protein                        |
| TERG_02528 | -2.06          | -2.82           | -2.42           | arsenic methyltransferase Cyt19             |
| TERG_00709 | -2.38          | -2.22           | -2.47           | hypothetical protein                        |
| TERG_05106 | -3.12          | -2.61           | -2.56           | hypothetical protein                        |
| TERG_08622 | -2.52          | -1.56           | -2.56           | transferase                                 |
| TERG_00073 | -1.88          | -1.85           | -2.61           | NADH-dependent flavin oxidoreductase        |
| TERG_06161 | -2.42          | -2.26           | -2.66           | multidrug resistance protein                |
| TERG_06445 | -2.30          | -3.77           | -2.74           | hypothetical protein                        |
| TERG_05849 | -1.84          | -1.59           | -2.80           | thioredoxin reductase                       |
| TERG_07427 | -2.58          | -2.45           | -2.82           | hypothetical protein                        |
| TERG_03855 | -1.92          | -2.48           | -2.90           | hypothetical protein                        |
| TERG_05409 | -1.84          | -2.94           | -2.98           | FAD dependent oxidoreductase                |
| TERG_00523 | -2.40          | -3.90           | -3.01           | hypothetical protein                        |
| TERG_02538 | -1.99          | -2.84           | -3.18           | hypothetical protein                        |
| TERG_06701 | -2.68          | -3.38           | -3.19           | gamma-glutamyltranspeptidase                |
| TERG_00227 | -1.72          | -3.05           | -3.25           | glutathione S-transferase                   |

---

|            |       |       |        |                                       |
|------------|-------|-------|--------|---------------------------------------|
| TERG_03443 | -2.66 | -2.40 | -3.30  | hypothetical protein                  |
| TERG_04303 | -3.98 | -3.33 | -3.31  | hypothetical protein                  |
| TERG_07408 | -2.51 | -3.14 | -3.38  | hypothetical protein                  |
| TERG_03712 | -2.00 | -2.70 | -3.44  | hypothetical protein                  |
| TERG_04146 | -2.40 | -2.77 | -3.47  | FAD binding domain-containing protein |
| TERG_03352 | -2.23 | -2.74 | -3.48  | tyrosine decarboxylase                |
| TERG_00736 | -3.14 | -3.47 | -3.54  | hypothetical protein                  |
| TERG_05677 | -2.24 | -2.64 | -3.59  | hypothetical protein                  |
| TERG_02400 | -1.93 | -3.01 | -3.62  | amino acid permease                   |
| TERG_06679 | -2.67 | -3.26 | -3.82  | hypothetical protein                  |
| TERG_07734 | -2.47 | -4.04 | -3.93  | O-methyltransferase                   |
| TERG_01338 | -3.01 | -3.77 | -3.93  | hypothetical protein                  |
| TERG_01401 | -3.78 | -2.15 | -4.06  | high affinity copper transporter      |
| TERG_02214 | -2.59 | -3.51 | -4.20  | zinc carboxypeptidase                 |
| TERG_03009 | -1.83 | -3.11 | -4.21  | hypothetical protein                  |
| TERG_07139 | -2.54 | -4.14 | -4.26  | hypothetical protein                  |
| TERG_06466 | -2.97 | -3.98 | -4.56  | hypothetical protein                  |
| TERG_08129 | -3.48 | -3.71 | -4.64  | amino acid permease                   |
| TERG_07861 | -2.54 | -3.61 | -4.81  | subtilase                             |
| TERG_01859 | -3.58 | -2.32 | -9.11  | hypothetical protein                  |
| TERG_01454 | -3.56 | -2.81 | -9.47  | microsomal dipeptidase                |
| TERG_05545 | -2.86 | -4.39 | -10.50 | hypothetical protein                  |
| TERG_05854 | -3.63 | -3.98 | -11.20 | beta-lactamase                        |
| TERG_02517 | -3.70 | -5.45 | -12.32 | hypothetical protein                  |

---
