# Supplementary material for: RNA-sequencing analysis of Trichophyton rubrum transcriptome in response to sublethal doses of acriflavine
Source: PubMed Central journal article supplement (PMC4243288; doi:10.1186/1471-2164-15-s7-s1), 2014-10-27
Supplement: 1471-2164-15-S7-S1-S5.pdf [file 1471-2164-15-S7-S1-S5.pdf]

**Table S3****Novel transcribed regions identified in the *T. rubrum* genome.**

| <b>Chromosome</b> | <b>Start</b> | <b>End</b> | <b>Name</b>   |
|-------------------|--------------|------------|---------------|
| Supercontig 1     | 48064        | 48616      | TCONS_0000001 |
| Supercontig 1     | 298934       | 300985     | TCONS_0000002 |
| Supercontig 1     | 301280       | 303009     | TCONS_0000003 |
| Supercontig 1     | 799814       | 800845     | TCONS_0000004 |
| Supercontig 1     | 938415       | 938547     | TCONS_0000005 |
| Supercontig 1     | 1367238      | 1368522    | TCONS_0000006 |
| Supercontig 1     | 1408696      | 1409013    | TCONS_0000007 |
| Supercontig 1     | 1409094      | 1409599    | TCONS_0000008 |
| Supercontig 1     | 1476100      | 1476481    | TCONS_0000009 |
| Supercontig 1     | 1555889      | 1557125    | TCONS_0000010 |
| Supercontig 1     | 1791520      | 1796216    | TCONS_0000011 |
| Supercontig 1     | 1796270      | 1798287    | TCONS_0000012 |
| Supercontig 1     | 1798387      | 1799582    | TCONS_0000013 |
| Supercontig 1     | 1873104      | 1873717    | TCONS_0000014 |
| Supercontig 1     | 2041983      | 2043441    | TCONS_0000015 |
| Supercontig 1     | 2044122      | 2045389    | TCONS_0000016 |
| Supercontig 1     | 2299147      | 2300245    | TCONS_0000017 |
| Supercontig 1     | 2300496      | 2302117    | TCONS_0000018 |
| Supercontig 1     | 2508283      | 2509291    | TCONS_0000019 |
| Supercontig 1     | 2678421      | 2679571    | TCONS_0000020 |
| Supercontig 1     | 3209772      | 3211965    | TCONS_0000021 |
| Supercontig 1     | 3266687      | 3266873    | TCONS_0000022 |
| Supercontig 1     | 3267258      | 3267948    | TCONS_0000023 |
| Supercontig 1     | 3336795      | 3337566    | TCONS_0000024 |
| Supercontig 1     | 3359397      | 3359573    | TCONS_0000025 |
| Supercontig 1     | 3445287      | 3446677    | TCONS_0000026 |
| Supercontig 1     | 3457208      | 3458064    | TCONS_0000027 |
| Supercontig 1     | 3479455      | 3480536    | TCONS_0000028 |
| Supercontig 1     | 3592386      | 3593403    | TCONS_0000029 |
| Supercontig 1     | 3662538      | 3663660    | TCONS_0000030 |
| Supercontig 1     | 3664191      | 3665120    | TCONS_0000031 |
| Supercontig 1     | 3693100      | 3693925    | TCONS_0000032 |
| Supercontig 1     | 3725014      | 3726205    | TCONS_0000033 |

---

|               |         |         |               |
|---------------|---------|---------|---------------|
| Supercontig 1 | 3809663 | 3811173 | TCONS_0000034 |
| Supercontig 1 | 3813300 | 3813899 | TCONS_0000035 |
| Supercontig 2 | 147611  | 148790  | TCONS_0000036 |
| Supercontig 2 | 203278  | 203543  | TCONS_0000037 |
| Supercontig 2 | 340504  | 341386  | TCONS_0000038 |
| Supercontig 2 | 417920  | 420407  | TCONS_0000039 |
| Supercontig 2 | 607922  | 609286  | TCONS_0000040 |
| Supercontig 2 | 856924  | 857069  | TCONS_0000041 |
| Supercontig 2 | 886204  | 886867  | TCONS_0000042 |
| Supercontig 2 | 1377827 | 1378243 | TCONS_0000043 |
| Supercontig 2 | 1505373 | 1506549 | TCONS_0000044 |
| Supercontig 2 | 1506616 | 1507627 | TCONS_0000045 |
| Supercontig 2 | 1768942 | 1769399 | TCONS_0000046 |
| Supercontig 2 | 1837620 | 1839226 | TCONS_0000047 |
| Supercontig 2 | 1957884 | 1959002 | TCONS_0000048 |
| Supercontig 2 | 1961914 | 1963451 | TCONS_0000049 |
| Supercontig 2 | 2099017 | 2101500 | TCONS_0000050 |
| Supercontig 2 | 2454861 | 2456392 | TCONS_0000051 |
| Supercontig 2 | 2471359 | 2472333 | TCONS_0000052 |
| Supercontig 2 | 2554188 | 2554829 | TCONS_0000053 |
| Supercontig 2 | 2641970 | 2643150 | TCONS_0000054 |
| Supercontig 2 | 2661721 | 2662739 | TCONS_0000055 |
| Supercontig 2 | 2839322 | 2840137 | TCONS_0000056 |
| Supercontig 2 | 2934368 | 2936039 | TCONS_0000057 |
| Supercontig 3 | 140549  | 142143  | TCONS_0000058 |
| Supercontig 3 | 323632  | 324731  | TCONS_0000059 |
| Supercontig 3 | 651527  | 652970  | TCONS_0000060 |
| Supercontig 3 | 699153  | 700151  | TCONS_0000061 |
| Supercontig 3 | 764718  | 765180  | TCONS_0000062 |
| Supercontig 3 | 857288  | 857858  | TCONS_0000063 |
| Supercontig 3 | 960823  | 962430  | TCONS_0000064 |
| Supercontig 3 | 964150  | 965407  | TCONS_0000065 |
| Supercontig 3 | 1713983 | 1714304 | TCONS_0000066 |
| Supercontig 3 | 1776378 | 1778361 | TCONS_0000067 |
| Supercontig 3 | 1863042 | 1863393 | TCONS_0000068 |
| Supercontig 3 | 1871126 | 1871278 | TCONS_0000069 |
| Supercontig 3 | 1897548 | 1897927 | TCONS_0000070 |

---

---

|               |         |         |               |
|---------------|---------|---------|---------------|
| Supercontig 3 | 1931792 | 1932025 | TCONS_0000071 |
| Supercontig 3 | 2045468 | 2046392 | TCONS_0000072 |
| Supercontig 3 | 2067117 | 2067805 | TCONS_0000073 |
| Supercontig 3 | 2107543 | 2108022 | TCONS_0000074 |
| Supercontig 3 | 2175938 | 2177441 | TCONS_0000075 |
| Supercontig 3 | 2177889 | 2178964 | TCONS_0000076 |
| Supercontig 3 | 2636914 | 2637823 | TCONS_0000077 |
| Supercontig 3 | 2806998 | 2807186 | TCONS_0000078 |
| Supercontig 3 | 2844388 | 2845576 | TCONS_0000079 |
| Supercontig 4 | 26353   | 27904   | TCONS_0000080 |
| Supercontig 4 | 189385  | 190925  | TCONS_0000081 |
| Supercontig 4 | 199395  | 200312  | TCONS_0000082 |
| Supercontig 4 | 438436  | 439285  | TCONS_0000083 |
| Supercontig 4 | 465073  | 465761  | TCONS_0000084 |
| Supercontig 4 | 488083  | 488763  | TCONS_0000085 |
| Supercontig 4 | 489176  | 490233  | TCONS_0000086 |
| Supercontig 4 | 707665  | 708598  | TCONS_0000087 |
| Supercontig 4 | 708662  | 709746  | TCONS_0000088 |
| Supercontig 4 | 709814  | 710802  | TCONS_0000089 |
| Supercontig 4 | 858143  | 862210  | TCONS_0000090 |
| Supercontig 4 | 981001  | 981557  | TCONS_0000091 |
| Supercontig 4 | 1015253 | 1017131 | TCONS_0000092 |
| Supercontig 4 | 1222875 | 1224851 | TCONS_0000093 |
| Supercontig 4 | 1266657 | 1268212 | TCONS_0000094 |
| Supercontig 4 | 1316635 | 1318758 | TCONS_0000095 |
| Supercontig 4 | 1544942 | 1545282 | TCONS_0000096 |
| Supercontig 4 | 1746467 | 1748432 | TCONS_0000097 |
| Supercontig 4 | 2076789 | 2077546 | TCONS_0000098 |
| Supercontig 5 | 27338   | 28685   | TCONS_0000099 |
| Supercontig 5 | 393653  | 394735  | TCONS_0000100 |
| Supercontig 5 | 404139  | 404405  | TCONS_0000101 |
| Supercontig 5 | 405102  | 405258  | TCONS_0000102 |
| Supercontig 5 | 408714  | 408904  | TCONS_0000103 |
| Supercontig 5 | 514436  | 515444  | TCONS_0000104 |
| Supercontig 5 | 669448  | 670234  | TCONS_0000105 |
| Supercontig 5 | 856950  | 858532  | TCONS_0000106 |
| Supercontig 5 | 1327943 | 1328639 | TCONS_0000107 |

---

---

|                |         |         |               |
|----------------|---------|---------|---------------|
| Supercontig 5  | 1420535 | 1420665 | TCONS_0000108 |
| Supercontig 5  | 1461800 | 1463517 | TCONS_0000109 |
| Supercontig 6  | 38867   | 39039   | TCONS_0000110 |
| Supercontig 6  | 492533  | 494917  | TCONS_0000111 |
| Supercontig 6  | 628222  | 628707  | TCONS_0000112 |
| Supercontig 6  | 895185  | 895624  | TCONS_0000113 |
| Supercontig 6  | 895749  | 896422  | TCONS_0000114 |
| Supercontig 6  | 913532  | 914910  | TCONS_0000115 |
| Supercontig 6  | 942333  | 943753  | TCONS_0000116 |
| Supercontig 6  | 1157984 | 1158724 | TCONS_0000117 |
| Supercontig 6  | 1171751 | 1173177 | TCONS_0000118 |
| Supercontig 6  | 1381925 | 1383088 | TCONS_0000119 |
| Supercontig 7  | 114817  | 115152  | TCONS_0000120 |
| Supercontig 7  | 198295  | 199882  | TCONS_0000121 |
| Supercontig 7  | 383064  | 384377  | TCONS_0000122 |
| Supercontig 7  | 723404  | 723608  | TCONS_0000123 |
| Supercontig 7  | 777300  | 778230  | TCONS_0000124 |
| Supercontig 7  | 790382  | 791312  | TCONS_0000125 |
| Supercontig 7  | 956076  | 956597  | TCONS_0000126 |
| Supercontig 7  | 1062948 | 1064051 | TCONS_0000127 |
| Supercontig 7  | 1222517 | 1224995 | TCONS_0000128 |
| Supercontig 7  | 1344492 | 1346228 | TCONS_0000129 |
| Supercontig 8  | 120034  | 120315  | TCONS_0000130 |
| Supercontig 8  | 364982  | 366734  | TCONS_0000131 |
| Supercontig 8  | 566522  | 566846  | TCONS_0000132 |
| Supercontig 8  | 649014  | 649760  | TCONS_0000133 |
| Supercontig 9  | 31148   | 33353   | TCONS_0000134 |
| Supercontig 9  | 177861  | 179018  | TCONS_0000135 |
| Supercontig 9  | 188938  | 189877  | TCONS_0000136 |
| Supercontig 9  | 408628  | 409810  | TCONS_0000137 |
| Supercontig 9  | 693054  | 693457  | TCONS_0000138 |
| Supercontig 9  | 695119  | 696616  | TCONS_0000139 |
| Supercontig 9  | 796435  | 797172  | TCONS_0000140 |
| Supercontig 10 | 14991   | 15726   | TCONS_0000141 |
| Supercontig 10 | 313286  | 315010  | TCONS_0000142 |
| Supercontig 10 | 422178  | 422364  | TCONS_0000143 |
| Supercontig 10 | 422427  | 422596  | TCONS_0000144 |

---

---

|                |        |        |               |
|----------------|--------|--------|---------------|
| Supercontig 10 | 422891 | 423123 | TCONS_0000145 |
| Supercontig 10 | 512927 | 513485 | TCONS_0000146 |
| Supercontig 10 | 536172 | 538315 | TCONS_0000147 |
| Supercontig 10 | 576724 | 577559 | TCONS_0000148 |
| Supercontig 10 | 621479 | 623460 | TCONS_0000149 |
| Supercontig 10 | 643535 | 645536 | TCONS_0000150 |
| Supercontig 10 | 724086 | 725892 | TCONS_0000151 |
| Supercontig 11 | 168881 | 170283 | TCONS_0000152 |
| Supercontig 11 | 178039 | 179792 | TCONS_0000153 |
| Supercontig 11 | 258373 | 260061 | TCONS_0000154 |
| Supercontig 12 | 8446   | 9710   | TCONS_0000155 |
| Supercontig 12 | 452574 | 453133 | TCONS_0000156 |
| Supercontig 18 | 13786  | 14642  | TCONS_0000157 |
| Supercontig 18 | 14724  | 15109  | TCONS_0000158 |
| Supercontig 18 | 15182  | 15938  | TCONS_0000159 |
| Supercontig 18 | 16130  | 16552  | TCONS_0000160 |
| Supercontig 18 | 16624  | 17180  | TCONS_0000161 |

---
