# Supplementary material for: RNA-sequencing analysis of Trichophyton rubrum transcriptome in response to sublethal doses of acriflavine
Source: PubMed Central journal article supplement (PMC4243288; doi:10.1186/1471-2164-15-s7-s1), 2014-10-27
Supplement: 1471-2164-15-S7-S1-S6.pdf [file 1471-2164-15-S7-S1-S6.pdf]

**Table S4****Intergenic regions validated by the RT-PCR assay.**

| <b>Chromosome</b> | <b>Start</b> | <b>End</b> | <b>Name</b>           | <b>Primer (5' - 3')</b>                                | <b>Amplicon (bp)</b> |
|-------------------|--------------|------------|-----------------------|--------------------------------------------------------|----------------------|
| Supercontig 1     | 3693100      | 3693925    | TCONS_0000032         | FW: GTAATGGCCGAAGGGAAACT<br>REV: GGCCTCTGCAGAATTGCTT   | 211                  |
| Supercontig 2     | 1957884      | 1959002    | TCONS_0000048         | FW: CCAATCAACACTCCAAAACG<br>REV: GCCAATTGAACAGTGGAGGT  | 616                  |
| Supercontig 4     | 438436       | 439285     | TCONS_0000083         | FW: CCCACCTGCGAATATACGAT<br>REV: CTTGTTCATCCCATGCAAATG | 206                  |
| Supercontig 5     | 1327943      | 1328639    | TCONS_0000107         | FW: GAGGAAACCGCAAAGTGAC<br>REV: ACAATTGCCAGGGTAACACC   | 197                  |
| Supercontig 9     | 695119       | 696616     | TCONS_0000139         | FW: AGAAGGATGAATGGCACTGG<br>REV: CAGGTTTCAGTTTGGCATGAA | 342                  |
| Supercontig 8     | 332979       | 334049     | TERG_06637<br>(actin) | FWD: GAATCTCCCCCCTCATGCTT<br>REV: GCCTGGGCTTCCGACACT   | 198                  |
