# Supplementary material for: RNA-sequencing analysis of Trichophyton rubrum transcriptome in response to sublethal doses of acriflavine
Source: PubMed Central journal article supplement (PMC4243288; doi:10.1186/1471-2164-15-s7-s1), 2014-10-27
Supplement: 1471-2164-15-S7-S1-S7.pdf [file 1471-2164-15-S7-S1-S7.pdf]

**Table S5****Primers used in qPCR analysis.**

| <b>ID<sup>(*)</sup></b> | <b>Gene Product Name</b>                 | <b>Primers (5' - 3')</b>                               | <b>Amplicon (bp)</b> | <b>Efficiency (%)</b> | <b>Concentration (nM)</b> |
|-------------------------|------------------------------------------|--------------------------------------------------------|----------------------|-----------------------|---------------------------|
| TERG_02214              | zinc carboxypeptidase                    | FW: ACGAAGGCGTCGTCCTACT<br>REV: AAAGCAACAAAGGCAAGAGC   | 121                  | 101.89                | 800                       |
| TERG_07861              | subtilase                                | FW: AACTATGACCGCTGGGATTG<br>REV: CTTCTCCTGGAGGACGTTGA  | 138                  | 101.72                | 700                       |
| TERG_06053              | catalase (peroxisomal catalase)          | FW: CTGAATCGCAACGTGAAAGA<br>REV: CAAACATACGCGCTTGAAGA  | 118                  | 95.42                 | 700                       |
| TERG_08557              | serine carboxypeptidase                  | FW: TGGACGGAGGCAAGTTTTAC<br>REV: TGCAGGTGCTGGTGTCTAAG  | 114                  | 100.03                | 700                       |
| TERG_02979              | Delta(24(24(1)))-sterol reductase (Erg4) | FW: CCTTCCCTTGGTTTTACTTCG<br>REV: TGTAGGGAACAGCCTTCTCG | 126                  | 102.07                | 600                       |
| TERG_03102              | sterol 24-C-methyltransferase (Erg6)     | FW: GGCTGACAAAGGGGACATAA<br>REV: TGGTCACTCGAAGAGCACTG  | 98                   | 101.35                | 800                       |
| TERG_01252              | catalase (catalase A)                    | FW: CCACTGGTGATGCAGTCAAT<br>REV: CACACCATAGCTCTCCACGA  | 107                  | 100.45                | 800                       |
| TERG_01281              | malate synthase                          | FW: CGCTGAGGGAAAGAGAGTTG<br>REV: CAGCGAGCTGGTACTTGTG   | 107                  | 102.92                | 600                       |
| TERG_00825              | isocitrate lyase                         | FW: TATCCATCGTCTGGGAGAGC<br>REV: GCTTAGCGTATGCCTTGGAA  | 107                  | 108.63                | 700                       |
| TERG_01076              | aconitase                                | FW: GGAATGCTTCCCCTTACCTT<br>REV: GGTGGACACGGAGAGTCATT  | 121                  | 91.35                 | 800                       |
| TERG_01871              | acetyl-CoA acetyltransferase             | FW: CAGCAAGTTCACCACTGCTC<br>REV: TGATCTCAAAGGCGTCAATG  | 92                   | 100.55                | 600                       |
| TERG_03762              | malate dehydrogenase                     | FW: GTTGACAGCCCCCTCTACAA<br>REV: TGCTCGTACTCGGAGACCTT  | 116                  | 96.77                 | 700                       |
| TERG_04125              | citrate synthase                         | FW: GCTACGTGTCTCAGCGTGAA<br>REV: GTGTTCCGGTCAAGACACCAG | 107                  | 106.77                | 600                       |

|            |                                        |                                                        |     |        |     |
|------------|----------------------------------------|--------------------------------------------------------|-----|--------|-----|
| TERG_02198 | CamK protein kinase                    | FW: CAAGGAATCCCAGAGCAAAG<br>REV: GTAGAATTCGCACCGAAAGC  | 112 | 95.14  | 700 |
| TERG_06573 | calcineurin regulatory subunit B       | FW: AGATGGCGGTGGTGACGTA<br>REV: CGAACTGAAGGCCGATAACC   | 61  | 97.80  | 400 |
| TERG_06392 | calmodulin                             | FW: GGCCAGAACCCTTCGGAAT<br>REV: TGTCGGCGTCAACCTCATT    | 58  | 107.50 | 400 |
| TERG_08613 | Multidrug resistance protein Mdr2      | FW: TGACGAGGCTACATCAGCAC<br>REV: GTCGGTGAGCAACAGCAATA  | 104 | 93.01  | 800 |
| TERG_07801 | ABC multidrug transporter Mdr4         | FW: GGAAATTGAGCTTCGAGACG<br>REV: TTCCAACGATAGCAGTGTGC  | 113 | 94.20  | 800 |
| TERG_05742 | DNA-dependent RNA polymerase II (rpb2) | FW: TGCAGGAGCTGGTGAAGA<br>REV: GCTGGGAGGTACTGTTTGATCAA | 59  | 94.99  | 300 |

(\*) TERG: gene accession number at the *T. rubrum* genome database at the Broad Institute.
